# Supplementary material for: Fluorinated carbon as high-performance cathode for aqueous zinc primary batteries
Source: Royal Society of Chemistry journal article supplement (doi:10.1039/d4ra00835a), 2024-01-01
Supplement: d4ra00835a1.pdf [file d4ra00835a1.pdf]

## **Fluorinated carbon as high-performance cathode for aqueous zinc primary batteries**

Congping Xu<sup>a, b, c</sup>, Liang Zhang<sup>d</sup>, Fupeng Liu<sup>\*a</sup>, Ruding Zhang<sup>\*b, c</sup>, Hongjun Yue<sup>\*b, c</sup>

<sup>a</sup> Faculty of Materials Metallurgy and Chemistry, Jiangxi University of Science and Technology, Ganzhou 341000 Jiangxi, China

<sup>b</sup> CAS Key Laboratory of Design and Assembly of Functional Nanostructures, and Fujian Provincial Key Laboratory of Nanomaterials, Fujian Institute of Research on the Structure of Matter, Chinese Academy of Sciences, Fuzhou 350002, China

<sup>c</sup> Xiamen Institute of Rare-earth Materials, Haixi Institutes, Chinese Academy of Sciences, Xiamen 361021, China

<sup>d</sup> State Key Laboratory of Advanced Chemical Power Sources, Guizhou Meiling Power Sources Co.Ltd., Zunyi 563003, China

\* Corresponding authors

E-mail address:

fupengliu@126.com; rdzhang@fjirsm.ac.cn; hjyue@fjirsm.ac.cn

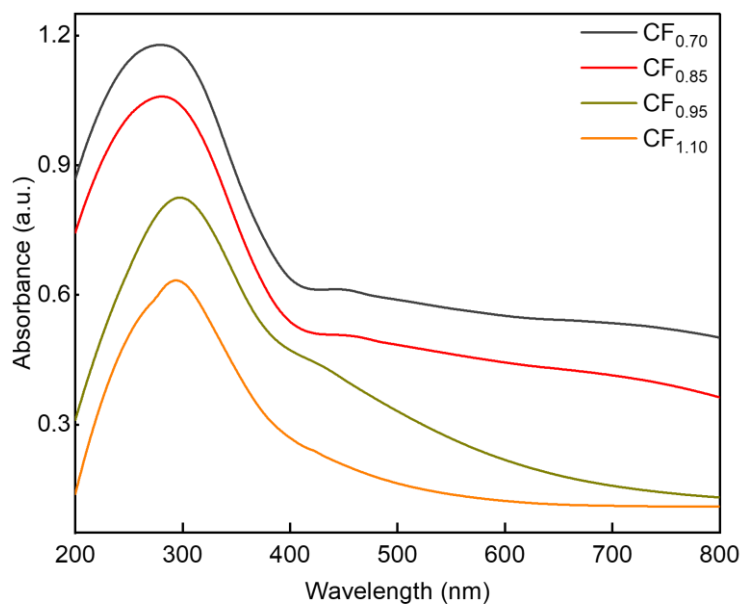

Fig. S1. UV-Vis spectra of the  $\text{CF}_x$  powder.

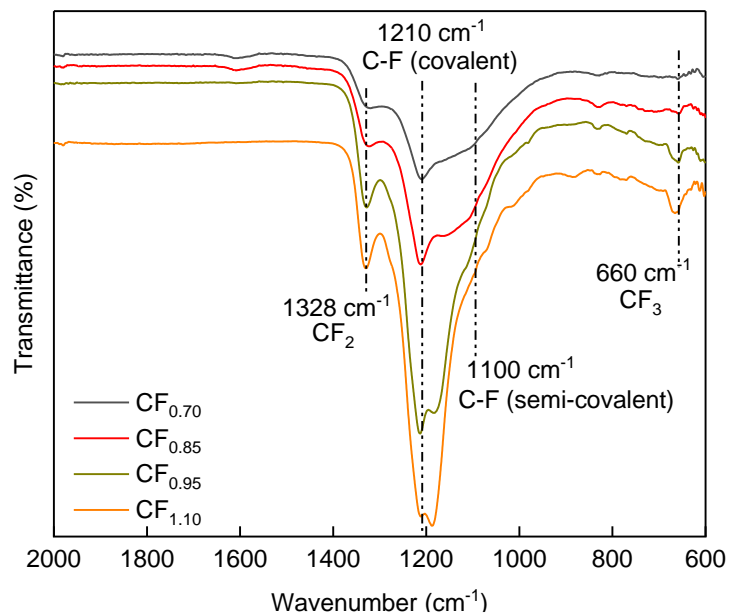

Fig. S2. IR absorption spectra of the  $\text{CF}_x$ .

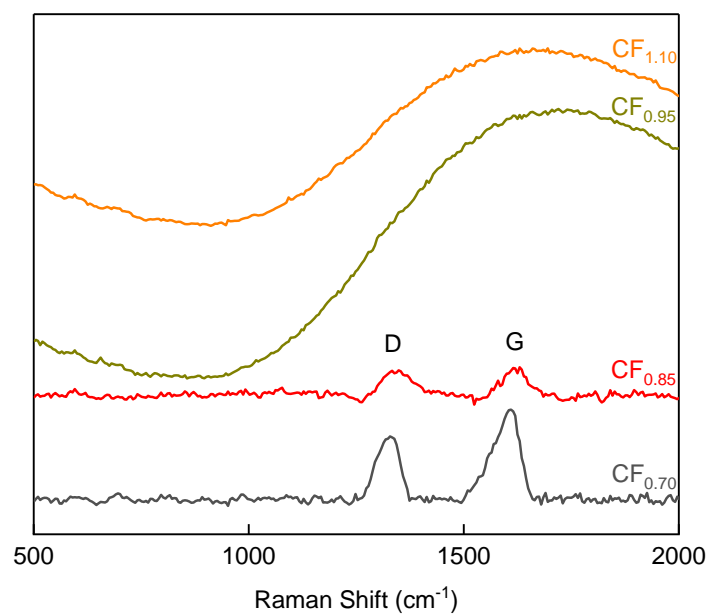

Fig. S3. Raman spectra of the  $CF_x$ .

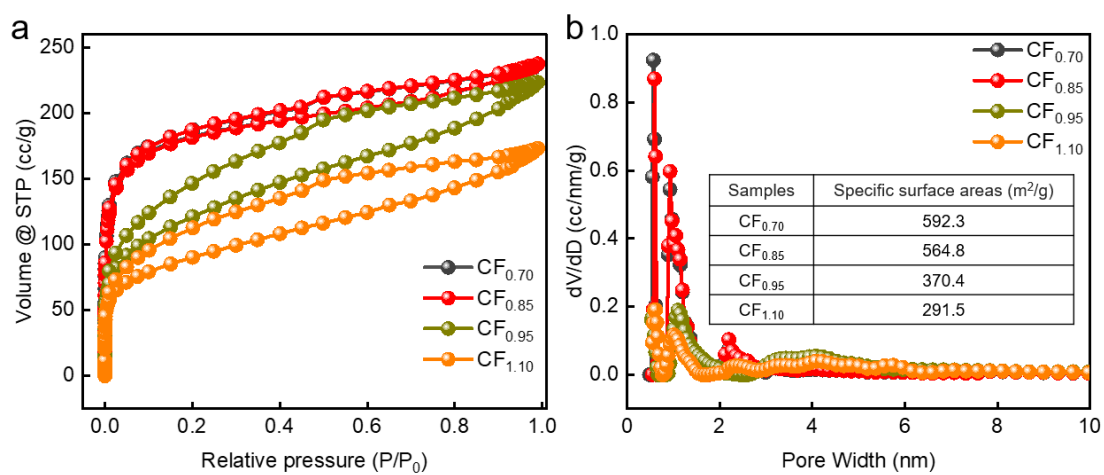

Fig. S4. (a) Nitrogen isotherms and (b) pore size distributions of  $CF_x$ . Illustration shows specific surface area.

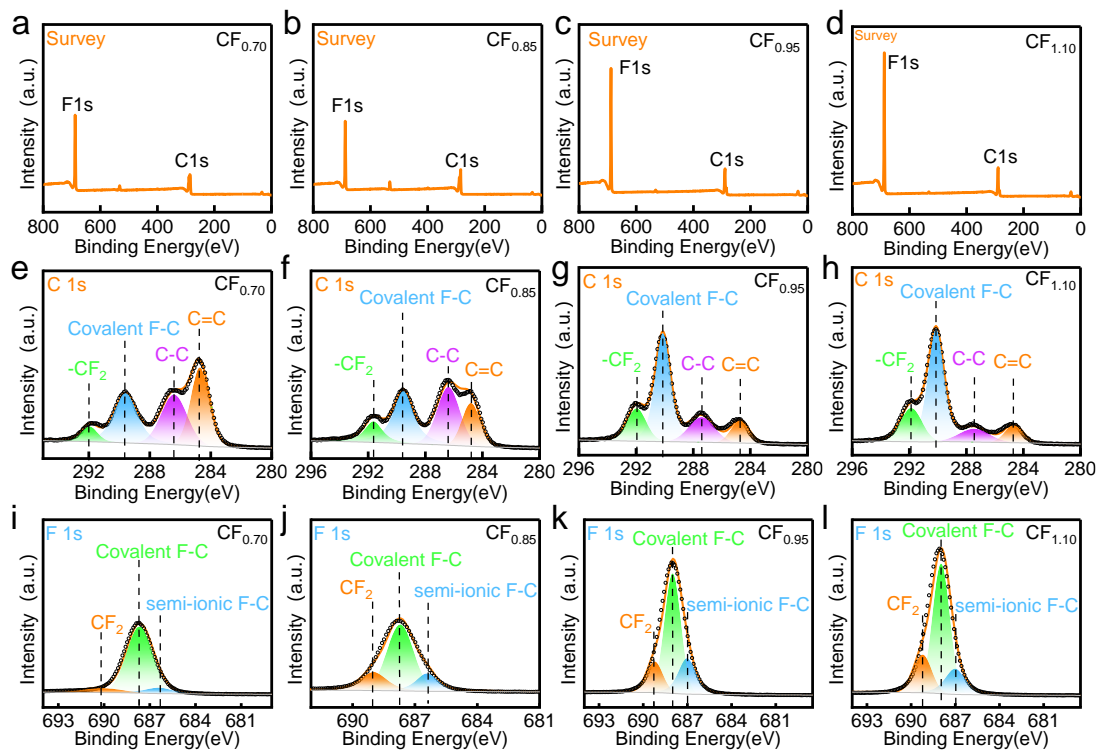

Fig. S5. The XPS survey spectra of  $CF_x$  (a-d). High resolution C 1s (e-h) and F 1s (i-l) spectra of  $CF_x$ .

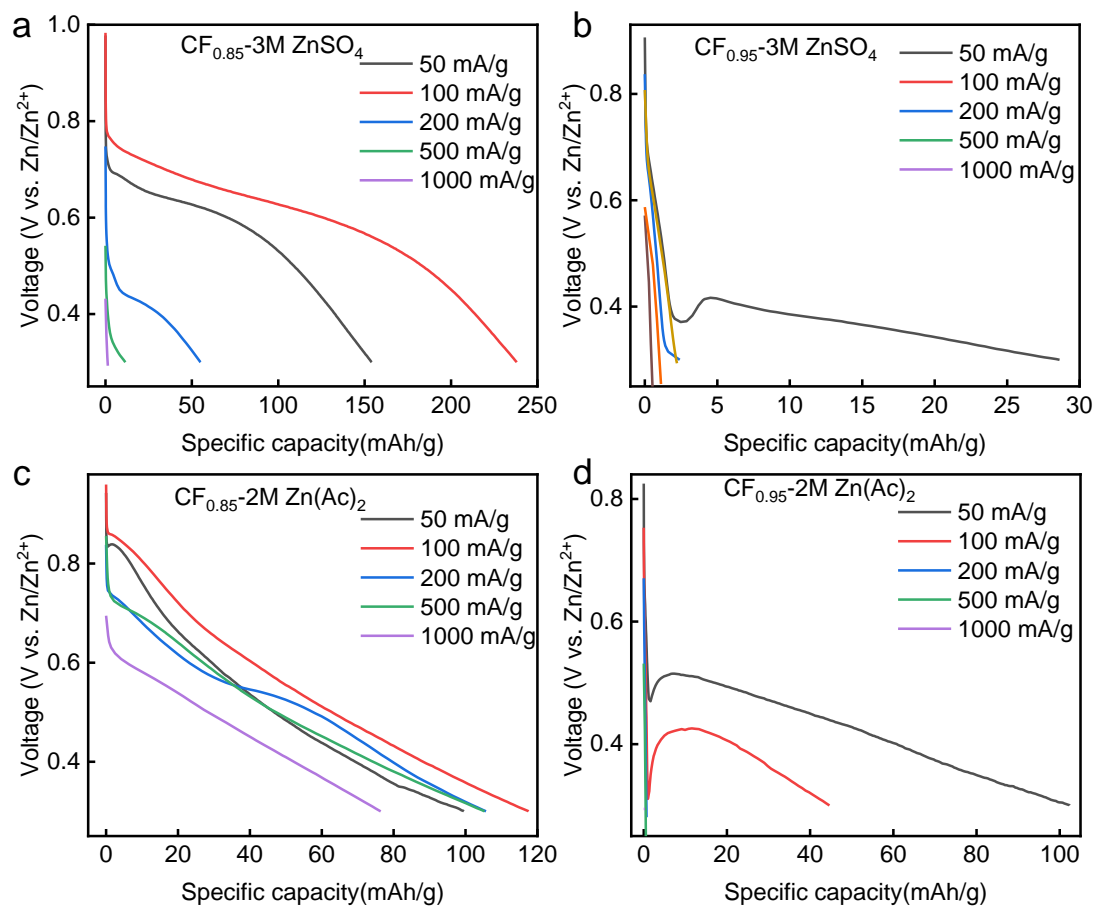

Fig.S6. Discharge curves of Zn/CF<sub>0.85</sub>, Zn/CF<sub>0.95</sub> with (a) and (b) zinc sulfate, (c) and (d) zinc acetate as electrolyte.

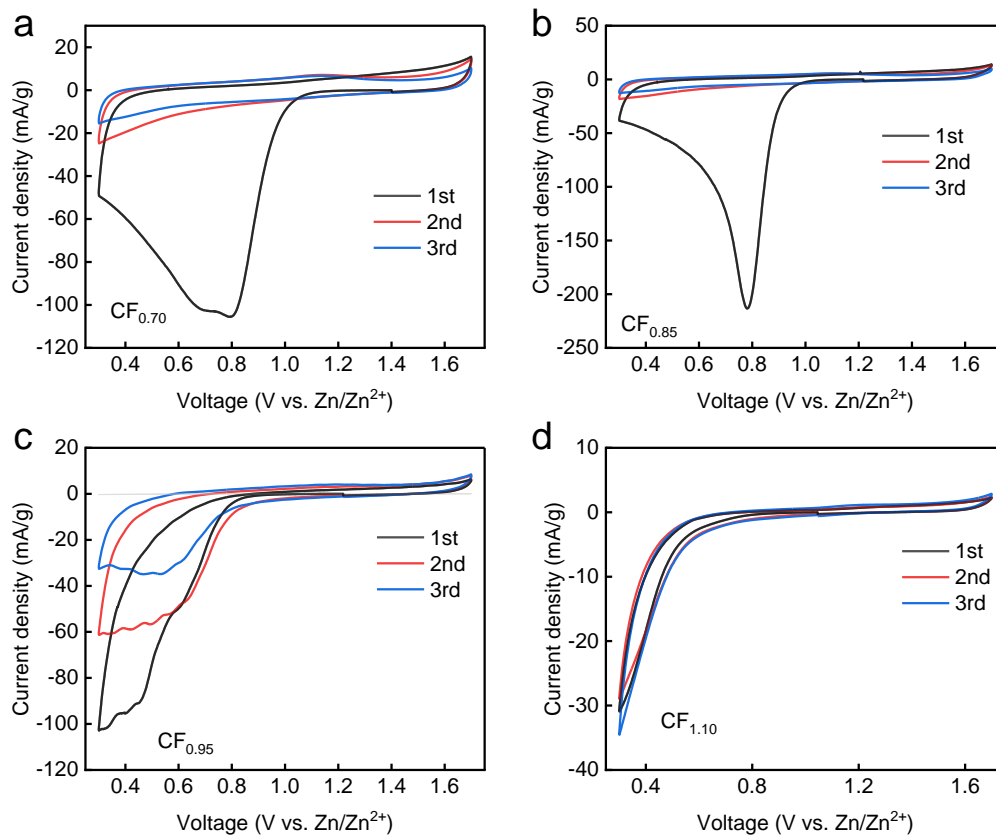

Fig.S7. CV profiles of the  $CF_x$  at a scan rate of 0.1 mV/s in aqueous  $Zn(OTf)_2$  (a)  $CF_{0.70}$ , (b)  $CF_{0.85}$ , (c)  $CF_{0.95}$ , (d)  $CF_{1.10}$ .

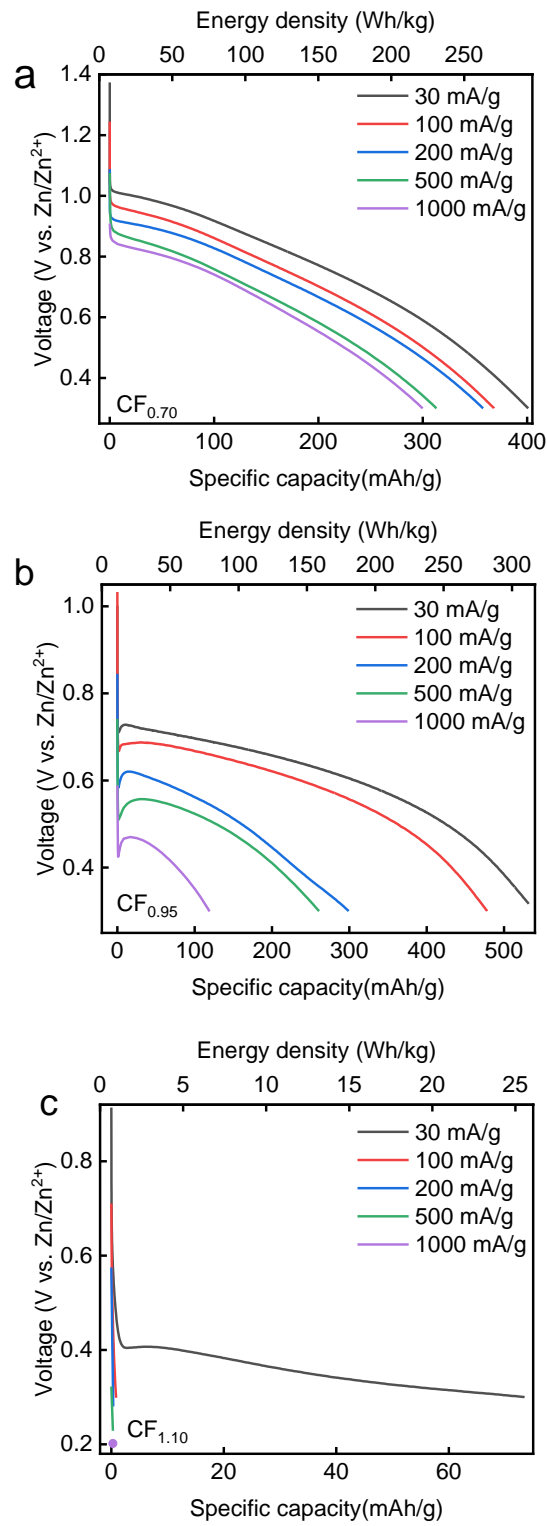

Fig.S8. Galvanostatic discharge plots of the (a) Zn/CF<sub>0.70</sub>, (b) Zn/CF<sub>0.95</sub>, (c) Zn/CF<sub>1.10</sub> battery at different rates.

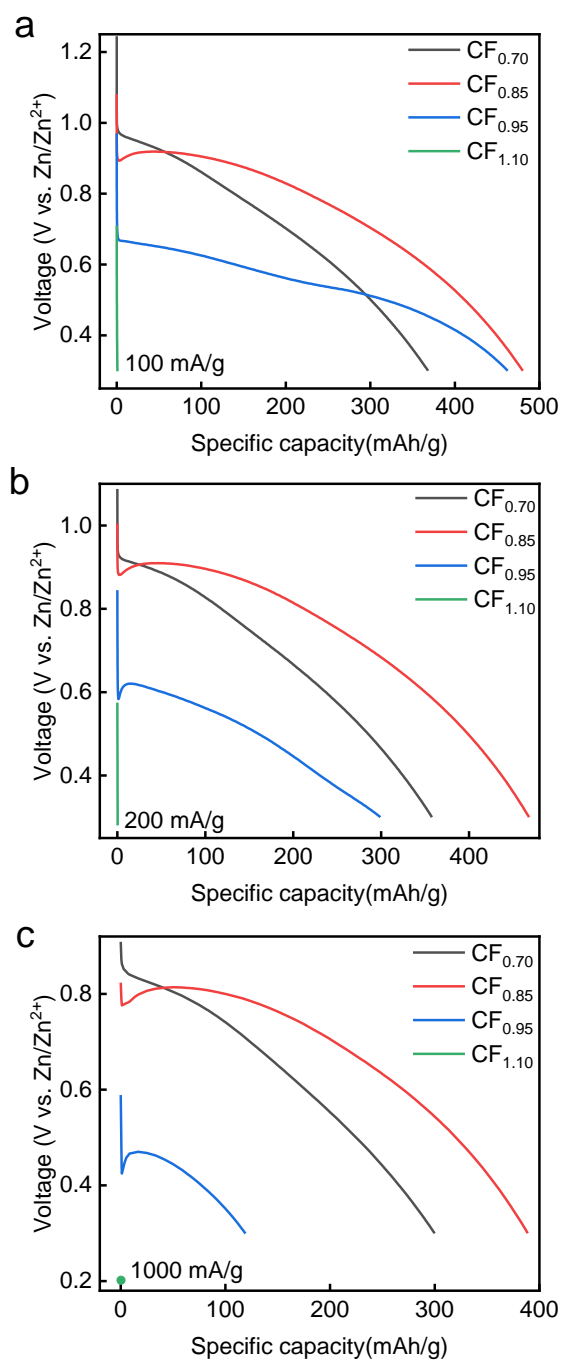

Fig.S9. Comparison of discharge curves of  $CF_x$  at the 25 °C (a) 100 mA/g, (b) 200 mA/g and (c) 1000 mA/g.



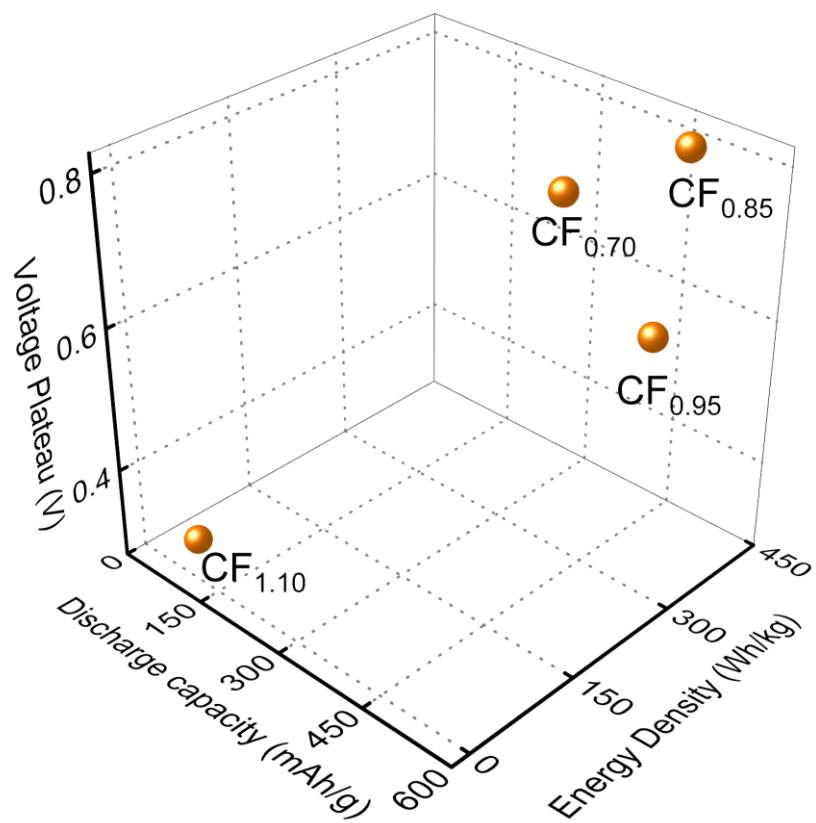

Fig.S10. Energy density, discharge capacity, and the corresponding voltage plateau of CF<sub>x</sub> at 30 mA/g.

Table S1. Discharge capacity, Energy density and mid-voltage of CF<sub>x</sub> at various current density and 25 °C.

|                    | 30 mA/g |      |      | 100 mA/g |      |      | 200 mA/g |      |      | 500 mA/g |      |      | 1000 mA/g |      |      |
|--------------------|---------|------|------|----------|------|------|----------|------|------|----------|------|------|-----------|------|------|
|                    | C       | E    | V    | C        | E    | V    | C        | E    | V    | C        | E    | V    | C         | E    | V    |
| CF <sub>0.70</sub> | 401     | 297  | 0.77 | 368      | 259  | 0.73 | 358      | 243  | 0.70 | 313      | 201  | 0.66 | 300       | 189  | 0.65 |
| CF <sub>0.85</sub> | 503     | 388  | 0.81 | 480      | 352  | 0.78 | 458      | 339  | 0.77 | 425      | 293  | 0.74 | 389       | 258  | 0.72 |
| CF <sub>0.95</sub> | 532     | 317  | 0.62 | 462      | 247  | 0.54 | 299      | 147  | 0.51 | 261      | 124  | 0.49 | 119       | 49   | 0.43 |
| CF <sub>1.10</sub> | 73.5    | 26.1 | 0.35 | 0.86     | 0.36 | 0.39 | 0.33     | 0.14 | 0.42 | 0.27     | 0.07 | 0.32 | 0.28      | 0.05 | 0.20 |

C denotes Capacity (mAh/g), E denotes Energy density (Wh/kg), V denotes Mid-voltage (V).

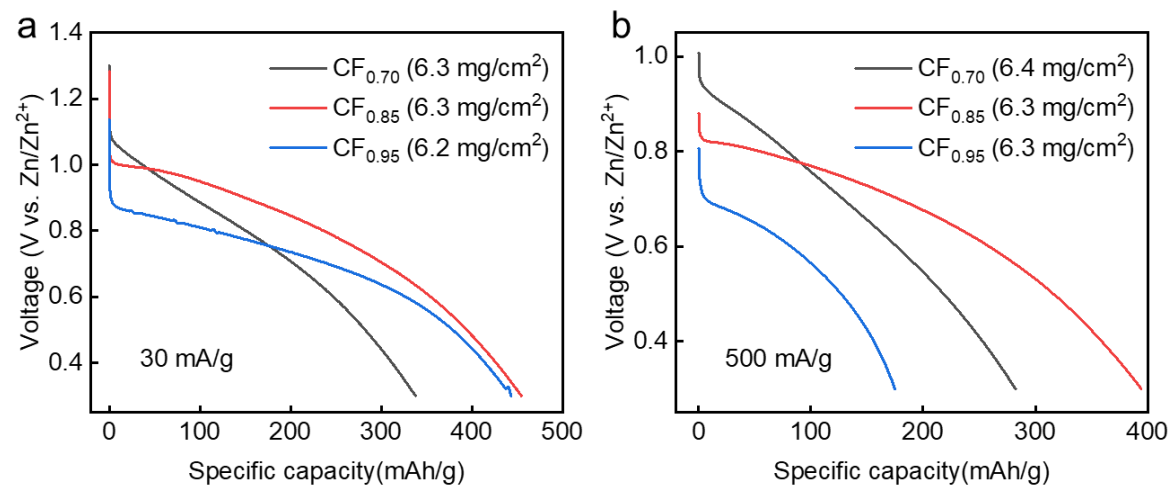

Fig.S11. Galvanostatic discharge curves of  $CF_x$  discharged with high mass loading.

Table S2. Discharge capacity, Energy density and mid-voltage of  $CF_x$  with high mass loading.

|             | 30 mA/g |     |      | 500 mA/g |     |      |
|-------------|---------|-----|------|----------|-----|------|
|             | C       | E   | V    | C        | E   | V    |
| $CF_{0.70}$ | 338     | 251 | 0.77 | 282      | 186 | 0.67 |
| $CF_{0.85}$ | 455     | 348 | 0.81 | 394      | 254 | 0.68 |
| $CF_{0.95}$ | 443     | 303 | 0.72 | 175      | 99  | 0.59 |

C denotes Capacity (mAh/g), E denotes Energy density (Wh/kg), V denotes Mid-voltage (V).

Table S3. Comparison with primary cells reported in the literature.

| Kinds of batteries   | Constructions                                     |                   | Voltage (V) | Capacity (mAh/g) | Energy density (Wh/kg) | Reaction mechanism                                                  | References |
|----------------------|---------------------------------------------------|-------------------|-------------|------------------|------------------------|---------------------------------------------------------------------|------------|
|                      | Electrolyte                                       | Cathode           |             |                  |                        |                                                                     |            |
| Zn/CF <sub>x</sub>   | Zn(CF <sub>3</sub> SO <sub>3</sub> ) <sub>2</sub> | CF <sub>x</sub>   | 1.0         | 503              | 388                    | $2CF_x + xZn^{2+} + xZn + 2xH_2O \rightarrow 2C + 2xZnOH + 2xH^+$   | This work  |
| Zn/MnO <sub>2</sub>  | KOH                                               | MnO <sub>2</sub>  | 1.2         | 224              | 234                    | $Zn + MnO_2 + 2H_2O + 2KOH \rightarrow Mn(OH)_2 + K_2[Zn(OH)_4]$    | 1          |
| Zn/HgO               | KOH                                               | HgO               | 1.2         | 190              | 266                    | $Zn + HgO = ZnO + Hg$                                               | 2          |
| Zn/Ag <sub>2</sub> O | KOH                                               | Ag <sub>2</sub> O | 1.5         | 180              | 287                    | $Zn + Ag_2O + H_2O \rightarrow Zn(OH)_2 + 2Ag$                      | 2          |
| Zn/O <sub>2</sub>    | NH <sub>4</sub> Cl/<br>KOH                        | O <sub>2</sub>    | 1.2         | 800              | 1350                   | $2Zn + O_2 \rightarrow 2ZnO$                                        | 2          |
| Mg/CF <sub>x</sub>   | APC/THF                                           | CF <sub>x</sub>   | 1.5         | 813              | 1085                   | $CF_x + \frac{x}{2}Mg^{2+} + xe^- \rightarrow C + \frac{x}{2}MgF_2$ | 3          |
| Li/CF <sub>x</sub>   | LiPF <sub>6</sub>                                 | CF <sub>x</sub>   | 2.7         | 922              | 2466                   | $CF_x + xLi \rightarrow C + xLiF$                                   | 4          |

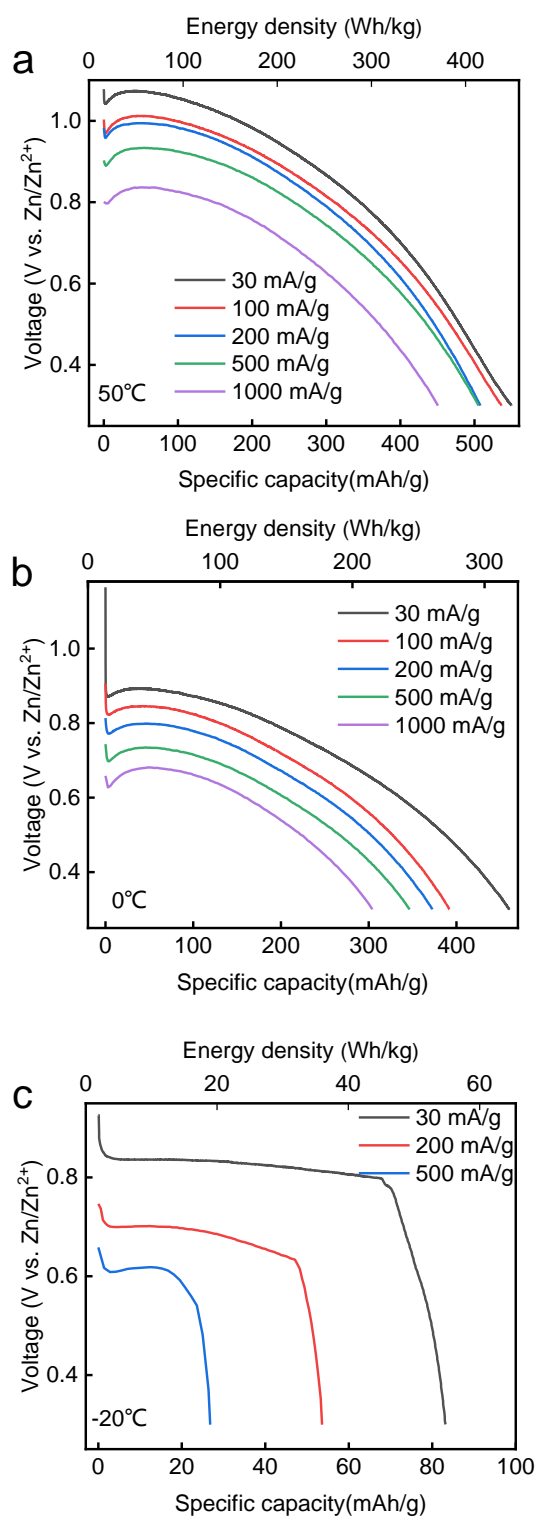

Fig.S12. Galvanostatic discharge plots of the Zn/CF<sub>0.85</sub> battery at (a) 50 °C, (b) 0 °C, (c) -20 °C

Table S4. Discharge capacity and voltage platform of CF<sub>0.85</sub> at various current density and tested temperatures.

|                        | 30 mA/g |      |       |       | 200 mA/g |      |       |       | 500 mA/g |      |       |       |
|------------------------|---------|------|-------|-------|----------|------|-------|-------|----------|------|-------|-------|
|                        | -20 °C  | 0 °C | 25 °C | 50 °C | -20 °C   | 0 °C | 25 °C | 50 °C | -20 °C   | 0 °C | 25 °C | 50 °C |
| Capacity (mAh/g)       | 83      | 460  | 503   | 550   | 54       | 373  | 468   | 508   | 27       | 347  | 425   | 505   |
| Energy density (Wh/kg) | 66      | 325  | 388   | 457   | 36       | 342  | 339   | 401   | 16       | 209  | 294   | 377   |
| Mid-voltage (V)        | 0.82    | 0.75 | 0.81  | 0.90  | 0.69     | 0.69 | 0.77  | 0.85  | 0.62     | 0.64 | 0.74  | 0.80  |

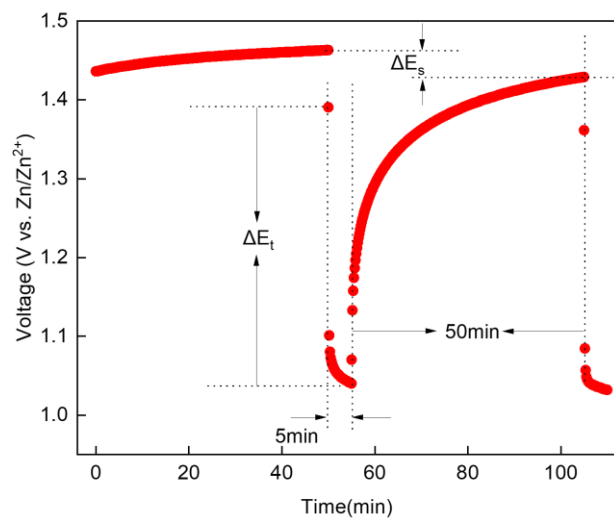

Fig. S13. Scheme for a single step of a GITT experiment.

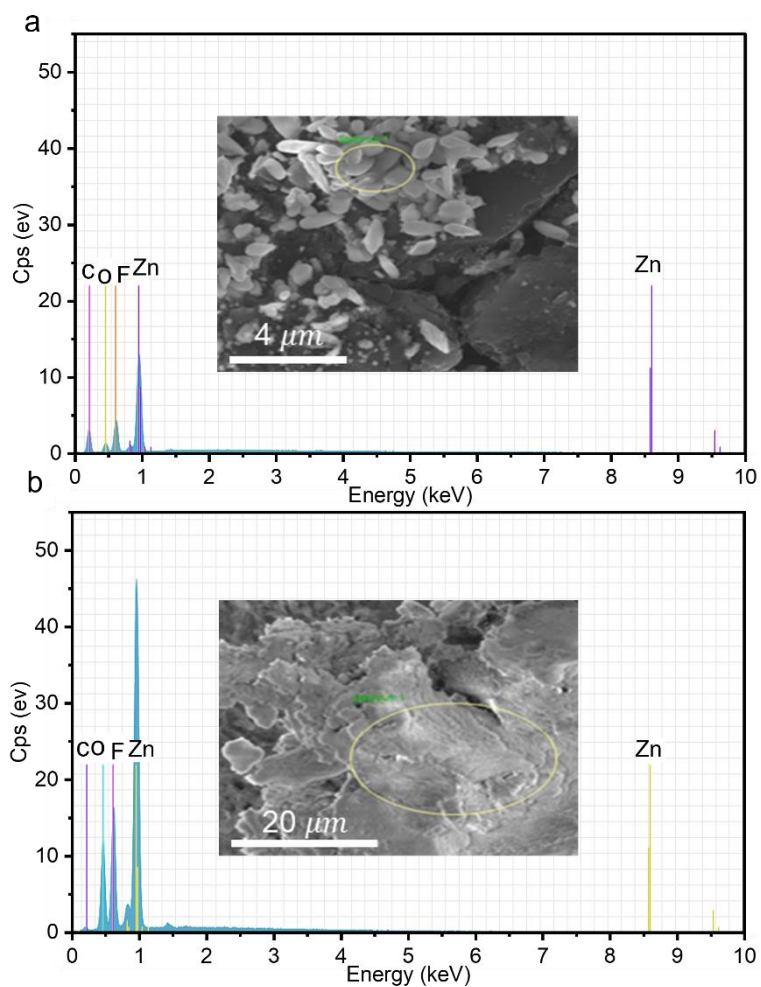

Fig.S14. EDS after discharging at 30 mA/g (a) and (b) cathode, (c) and (d) anode.

Table S5. Cathode and anode element content after discharging at 30 mA/g.

|                 |         | element | C     | O     | F     | Zn    |
|-----------------|---------|---------|-------|-------|-------|-------|
| atomic<br>ratio | cathode |         | 38.37 | 18.48 | 25.75 | 17.40 |
|                 | anode   |         | 2.56  | 31.76 | 36.23 | 29.44 |

## References

1. D. Linden, Handbook of batteries and Fuel Cell, Mc Graw-Hill, New York, 1984: Part I ,chapt.1-3
2. T. Sarakonsri and R. Vasant Kumar, *Rechargeable Ion Batteries: Materials, Design and Applications of Li-Ion Cells and Beyond*, 2023, 21-47.
3. X. Miao, J. Yang, W. Pan, H. Yuan, Y. Nuli and S.-i. Hirano, *Electrochimica Acta*, 2016, **210**, 704-711.
4. C. Peng, Y. Li, F. Yao, H. Fu, R. Zhou, Y. Feng and W. Feng, *Carbon*, 2019, **153**, 783-791.
